# Supplementary material
Source: PubMed Central journal article supplement (PMC7934642)
Supplement: NIHMS1658132-supplement-Supp__Table1.pdf [file NIHMS1658132-supplement-Supp__Table1.pdf]

**Supplementary Tables**

**Table 1. Logistic cross-classified multilevel models (CCMM) predicting past week extended screen time (14 hours or more) in the National Longitudinal Study of Adolescent to Adult Health, Wave I, 1994-1995 (N=18,642).**

|                                      | <b>Model 1<br/>Individual<br/>Predictors</b>            | <b>Model 2<br/>Individual<br/>and School<br/>Predictors</b> | <b>Model 3<br/>Individual and<br/>Neighborhood<br/>Predictors</b> | <b>Model 4<br/>Individual, School,<br/>and Neighborhood<br/>Predictors</b> |
|--------------------------------------|---------------------------------------------------------|-------------------------------------------------------------|-------------------------------------------------------------------|----------------------------------------------------------------------------|
| <b>Fixed Effect Estimates</b>        | <b>Odds Ratio (95% Credible Interval)</b>               |                                                             |                                                                   |                                                                            |
| Intercept, $\beta$ log odds (95% CI) | 2.58 (2.41, 2.76)                                       | 2.76 (2.32, 3.14)                                           | 2.89 (2.42, 3.26)                                                 | 2.99 (2.60, 3.33)                                                          |
| <b>Individual-Level</b>              |                                                         |                                                             |                                                                   |                                                                            |
| Age (years)                          | 0.87 (0.86, 0.88)                                       | 0.87 (0.76, 0.89)                                           | 0.87 (0.076, 0.90)                                                | 0.87 (0.85, 0.89)                                                          |
| Female Gender                        | 0.59 (0.55, 0.62)                                       | 0.58 (0.55, 0.62)                                           | 0.58 (0.55, 0.62)                                                 | 0.58 (0.55, 0.62)                                                          |
| Race/Ethnicity                       |                                                         |                                                             |                                                                   |                                                                            |
| White                                | REF                                                     | REF                                                         | REF                                                               | REF                                                                        |
| Black                                | 1.66 (1.49, 1.84)                                       | 1.60 (1.44, 1.80)                                           | 1.55 (1.38, 1.75)                                                 | 1.52 (1.35, 1.70)                                                          |
| Asian                                | 1.17 (1.00, 1.36)                                       | 1.15 (0.99, 1.35)                                           | 1.14 (0.97, 1.31)                                                 | 1.15 (0.98, 1.33)                                                          |
| Hispanic                             | 1.10 (0.99, 1.23)                                       | 1.07 (0.96, 1.19)                                           | 1.07 (0.96, 1.20)                                                 | 1.06 (0.94, 1.18)                                                          |
| Other                                | 1.09 (0.83, 1.42)                                       | 1.05 (0.79, 1.36)                                           | 1.06 (0.80, 1.38)                                                 | 1.03 (0.79, 1.35)                                                          |
| Multiracial                          | 1.19 (1.02, 1.38)                                       | 1.18 (1.00, 1.37)                                           | 1.16 (0.99, 1.36)                                                 | 1.17 (0.99, 1.38)                                                          |
| Parental Education                   |                                                         |                                                             |                                                                   |                                                                            |
| Less than high school                | REF                                                     | REF                                                         | REF                                                               | REF                                                                        |
| High school graduate/GED             | 1.13 (1.01, 1.25)                                       | 1.15 (1.03, 1.27)                                           | 1.13 (1.01, 1.25)                                                 | 1.15 (1.03, 1.28)                                                          |
| Some college                         | 1.14 (1.03, 1.28)                                       | 1.16 (1.05, 1.28)                                           | 1.13 (1.01, 1.25)                                                 | 1.16 (1.04, 1.30)                                                          |
| College graduate or beyond           | 1.13 (1.01, 1.25)                                       | 0.97 (0.87, 1.08)                                           | 0.95 (0.86, 1.06)                                                 | 0.98 (0.88, 1.10)                                                          |
| Parent Receipt of Public Assistance  | 0.93 (0.83, 1.03)                                       |                                                             | 1.14 (1.02, 1.27)                                                 | 1.12 (1.00, 1.25)                                                          |
| School currently in session          | 0.74 (0.69, 0.79)                                       | 0.73 (0.68, 0.78)                                           | 0.73 (0.68, 0.78)                                                 | 0.73 (0.68, 0.77)                                                          |
| <b>School-Level*</b>                 |                                                         |                                                             |                                                                   |                                                                            |
| Percent White Race                   |                                                         | 0.99 (0.96, 1.03)                                           |                                                                   | 1.00 (0.97, 1.03)                                                          |
| Percent on Public Assistance         |                                                         | 1.14 (1.01, 1.27)                                           |                                                                   | 1.14 (1.04, 1.24)                                                          |
| Parental College Degree              |                                                         | 0.93 (0.89, 0.98)                                           |                                                                   | 0.94 (0.90, 1.00)                                                          |
| <b>Neighborhood-Level*</b>           |                                                         |                                                             |                                                                   |                                                                            |
| Percent White Race                   |                                                         |                                                             | 0.98 (0.96, 1.00)                                                 | 0.98 (0.96, 1.00)                                                          |
| Percent on Public Assistance         |                                                         |                                                             | 0.99 (0.92, 1.06)                                                 | 0.97 (0.91, 1.03)                                                          |
| Percent with College Degree          |                                                         |                                                             | 0.95 (0.90, 0.99)                                                 | 0.97 (0.93, 1.00)                                                          |
| <b>Random Effect Estimates</b>       | <b>Variance Parameter (95% Credible Interval) [ICC]</b> |                                                             |                                                                   |                                                                            |
| School                               | 0.12 (0.08, 0.17) [3%]                                  | 0.08 (0.05, 0.12) [2%]                                      | 0.11 (0.07, 0.15) [3%]                                            | 0.09 (0.06, 0.13) [3%]                                                     |
| Neighborhood                         | 0.03 (0.01, 0.04) [1%]                                  | 0.02 (0.01, 0.06) [1%]                                      | 0.03 (0.01, 0.05) [1%]                                            | 0.01 (0.00, 0.018) [0%]                                                    |
| <b>Fit Statistics (DIC)</b>          | 24077                                                   | 24067                                                       | 24073                                                             | 24065                                                                      |

ICC: intra-class correlation

DIC: deviance information criterion

\*School and neighborhood-level predictors are presented as estimate for a 10% change in the predictor.
